# Supplementary figures and images for: A Functional Genomic Yeast Screen to Identify Pathogenic Bacterial Proteins
Source: PLOS journal article supplement (doi:10.1371/journal.ppat.0040009), 2008-01-15

### Linear and cubic curves fit to data

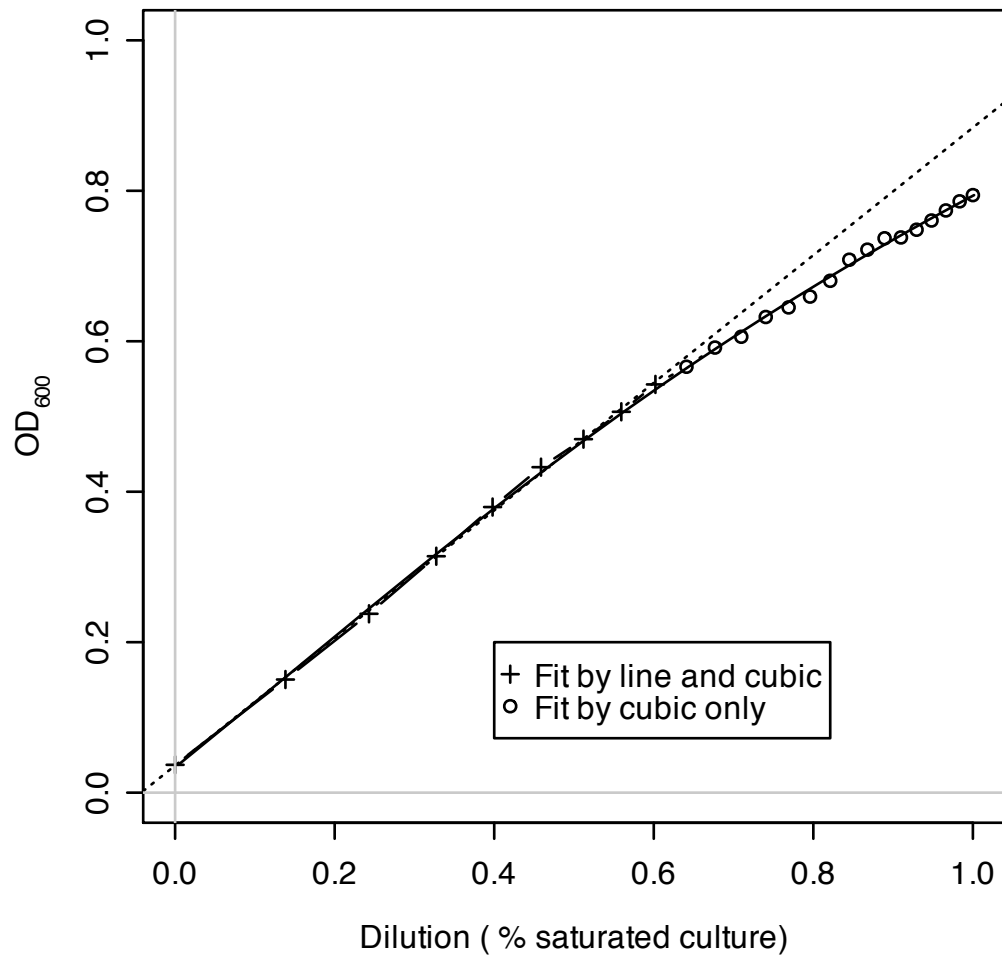

### OD Correction Curve

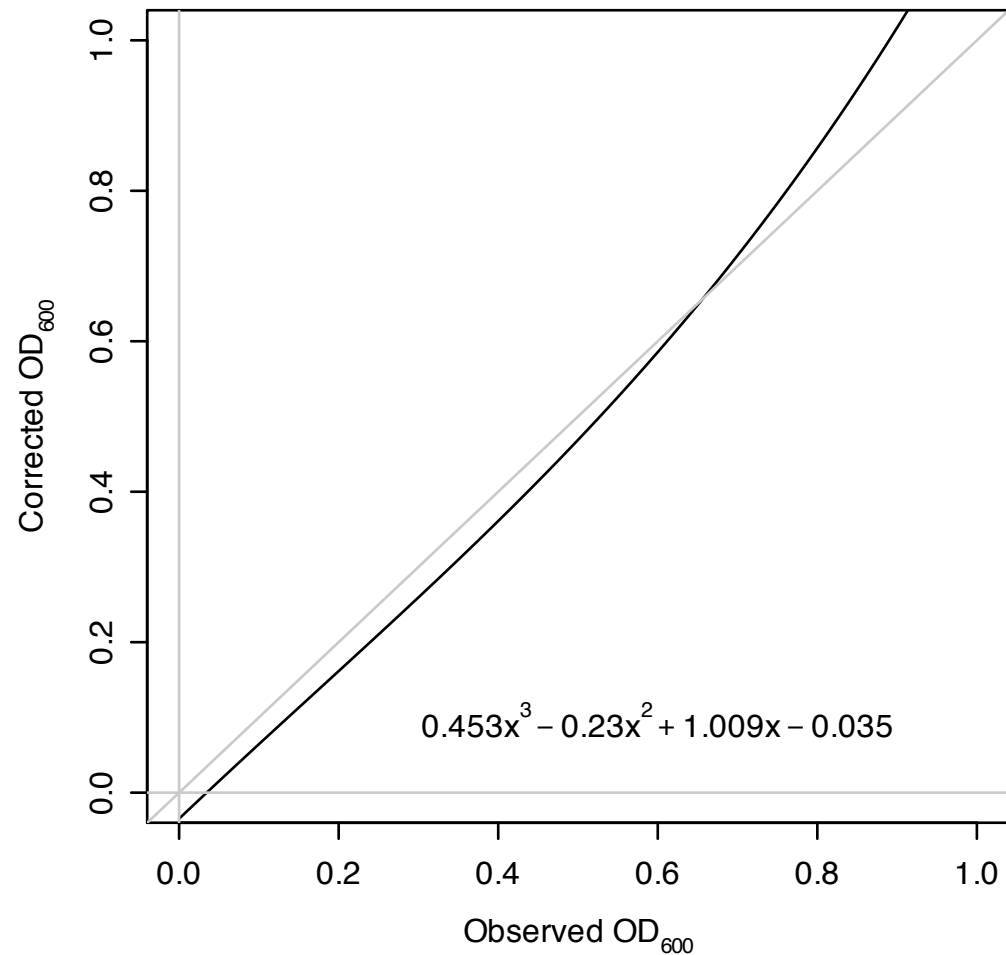

Supplement: S1 (10.1371/journal.ppat.0040009.s001) [file journal.ppat.0040009.s001]
